# MIND TO MIND

*Creative writing that explores the abstract side  
of our profession and our lives*

*Carol Wiley Cassella, M.D., Editor*

## My Postop Visit

James M. Berry, M.D.

**Y**ou calmed my fear  
Cannulated my vein  
Examined my airway  
Monitored my heart  
Erased my consciousness  
Stole my breath  
Blocked my receptors  
Supported my circulation  
Replaced my blood  
Warmed my skin  
Then whispered, "We're done..."  
  
Thank you

---

From the Vanderbilt University School of Medicine, Nashville, Tennessee. james.berry@vanderbilt.edu  
Accepted for publication March 4, 2016.

*Permission to reprint granted to the American Society of Anesthesiologists, Inc., and Wolters Kluwer Health, Inc., by copyright author/owner.*  
Anesthesiology 2016; 125:809
